# Supplementary material
Source: publisher site journal article supplement (https://www.dovepress.com/article/395563)
Supplement: Supplementary file 1 [file get_supplementary_file.php]

Supplementary material

Figure S1

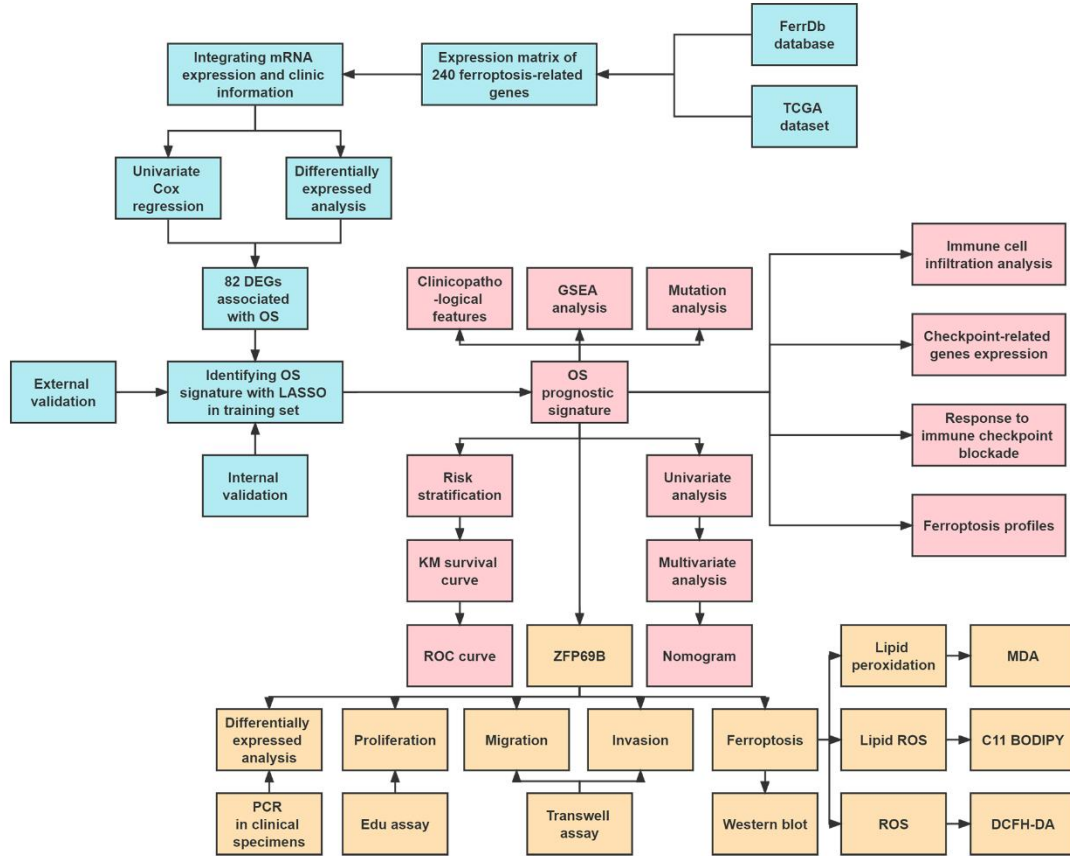

Figure S1 The work flow for this study.

Figure S2

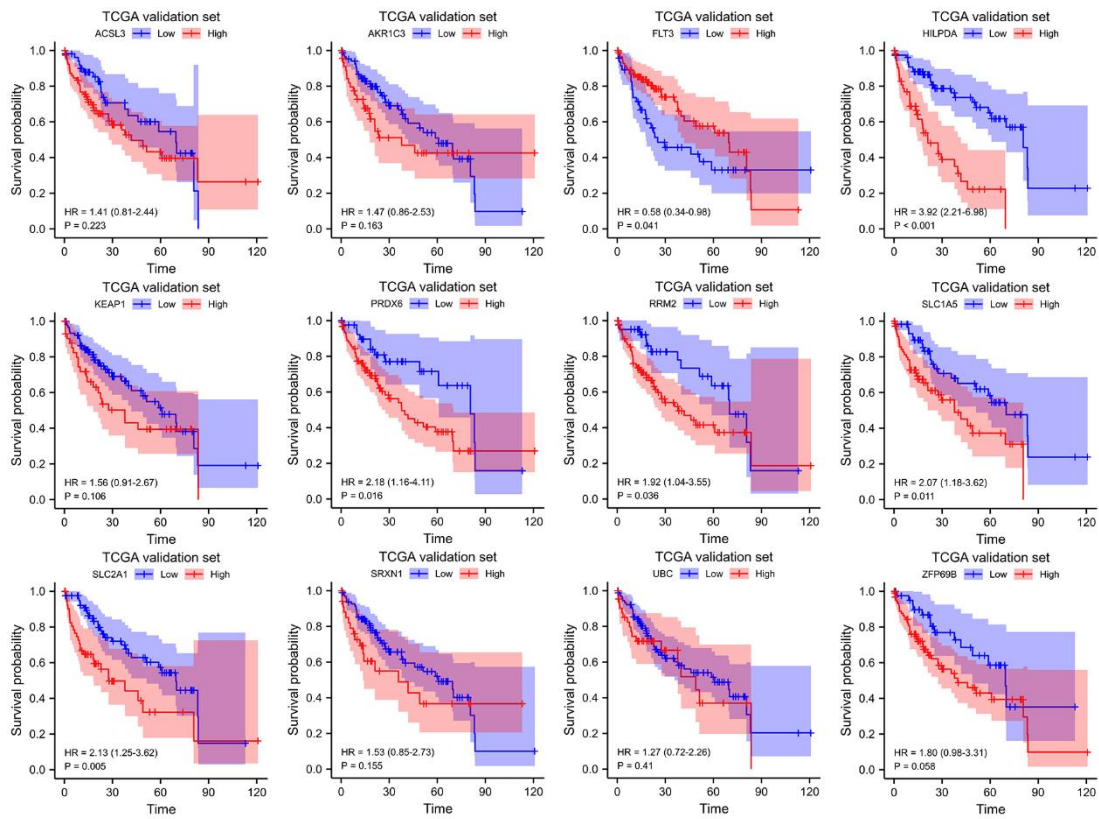

Figure S2 The KM survival curve for 12 FRGs in TCGA validation set.

**Figure S3**

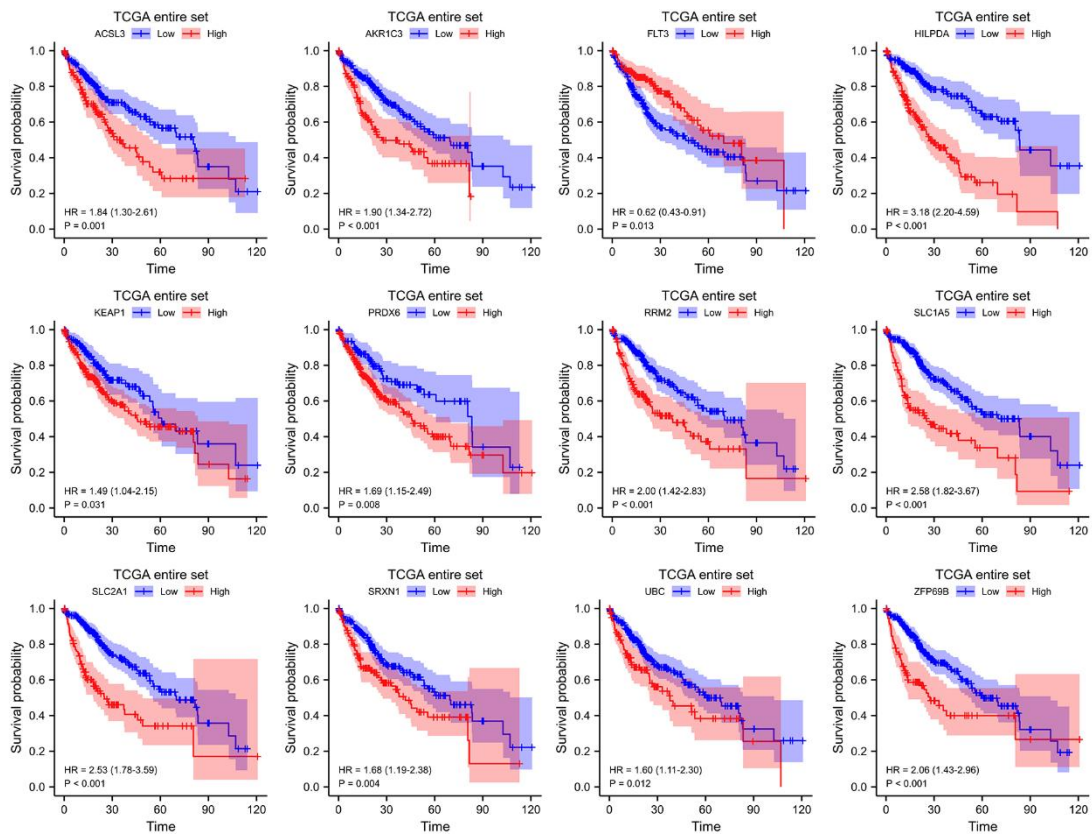

**Figure S3 The KM survival curve for 12 FRGs in TCGA entire set.**

Figure S4

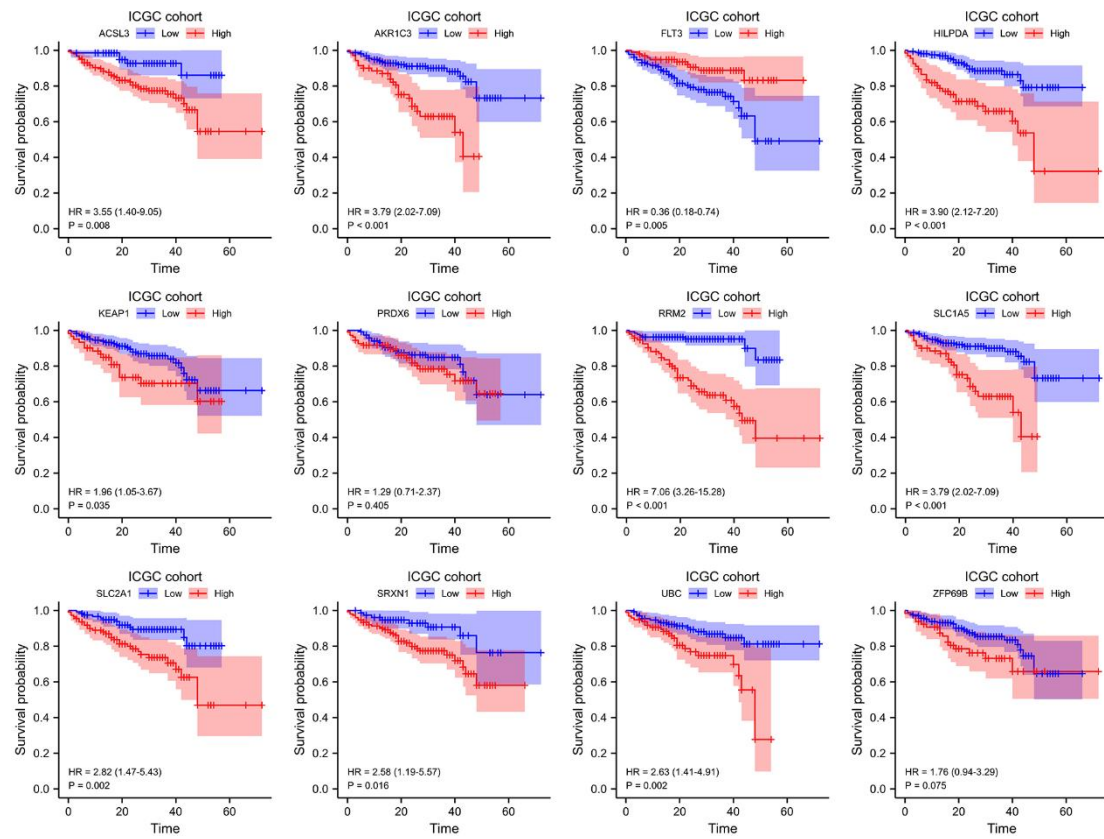

Figure S4 The KM survival curve for 12 FRGs in ICGC cohort.

**Figure S5**

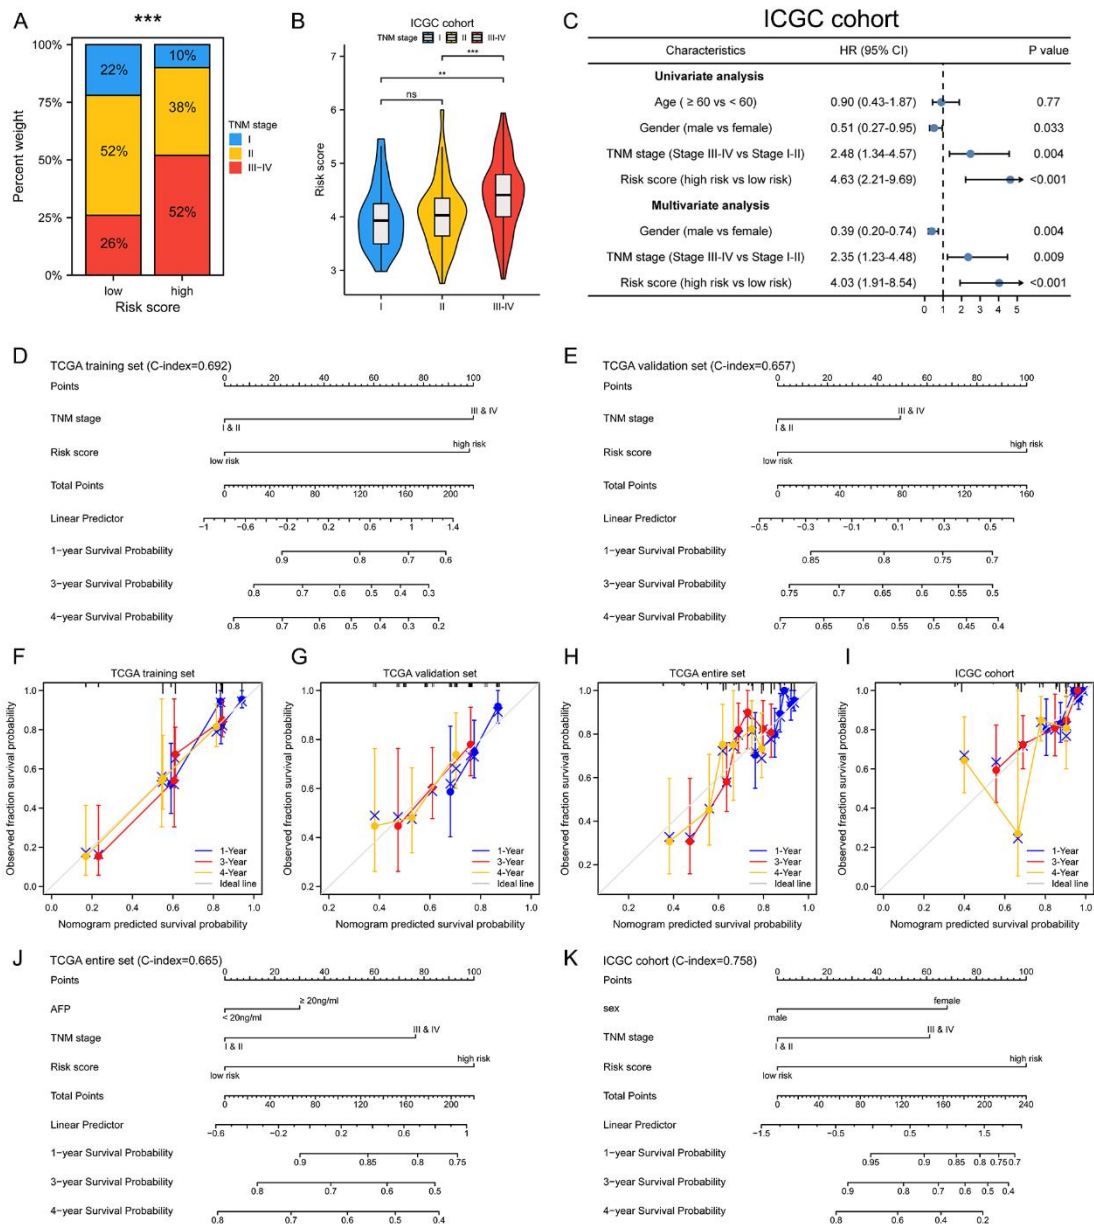

**Figure S5 Development of nomograms to predict OS of HCC patients. (A-B)** Correlation between risk score and TNM stage in ICGC cohort. **(C)** Univariate and multivariate Cox regression analyses in different TCGA cohorts. Nomograms predicting OS in TCGA training set **(D)**, TCGA validation set **(E)**, TCGA entire set **(J)** and ICGC cohort **(K)**. **(F-I)** Calibration curves for predicting 1-year, 3-year and 4-year OS in different cohorts. \*  $p < 0.05$ , \*\*  $p < 0.01$ , \*\*\*  $p < 0.001$ .

**Figure S6**

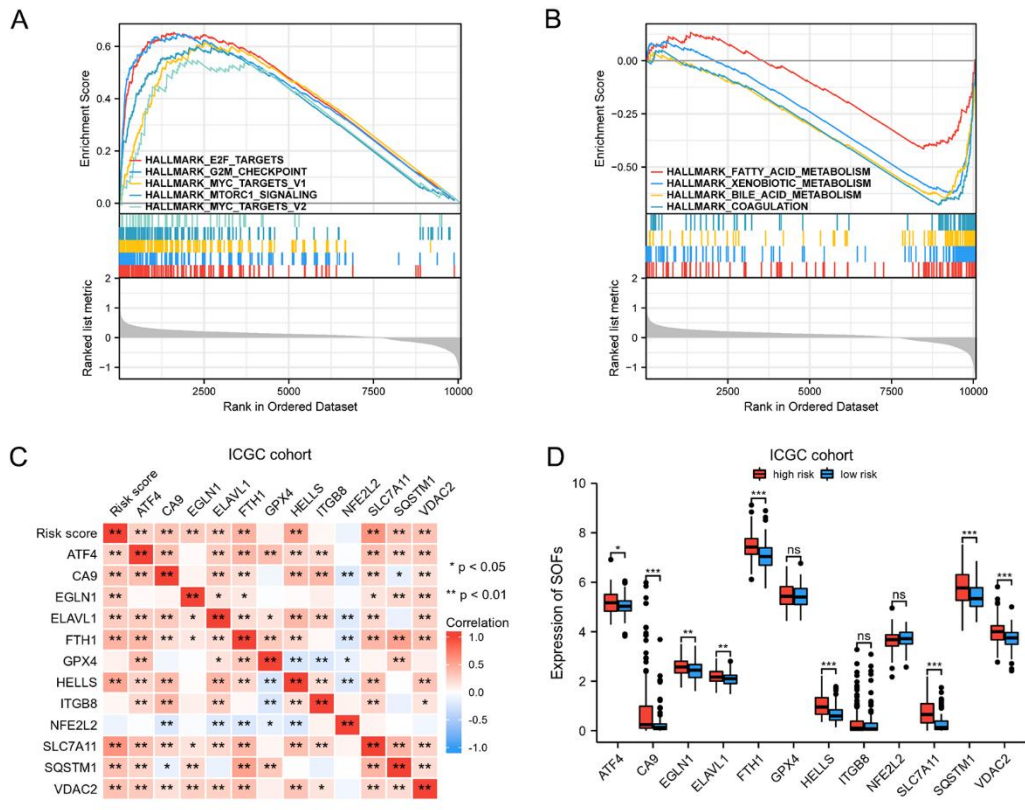

**Figure S6 Pathway enrichment and transcriptional changes of SOFs in different subgroups.** (A-B) GSEA enrichment analyses for different risk group of ICGC cohort. (C-D) The correlation between risk score and SOFs and transcriptional changes in SOFs in different subgroups of ICGC cohort. \*  $p < 0.05$ , \*\*  $p < 0.01$ , \*\*\*  $p < 0.001$ .

**Figure S7**

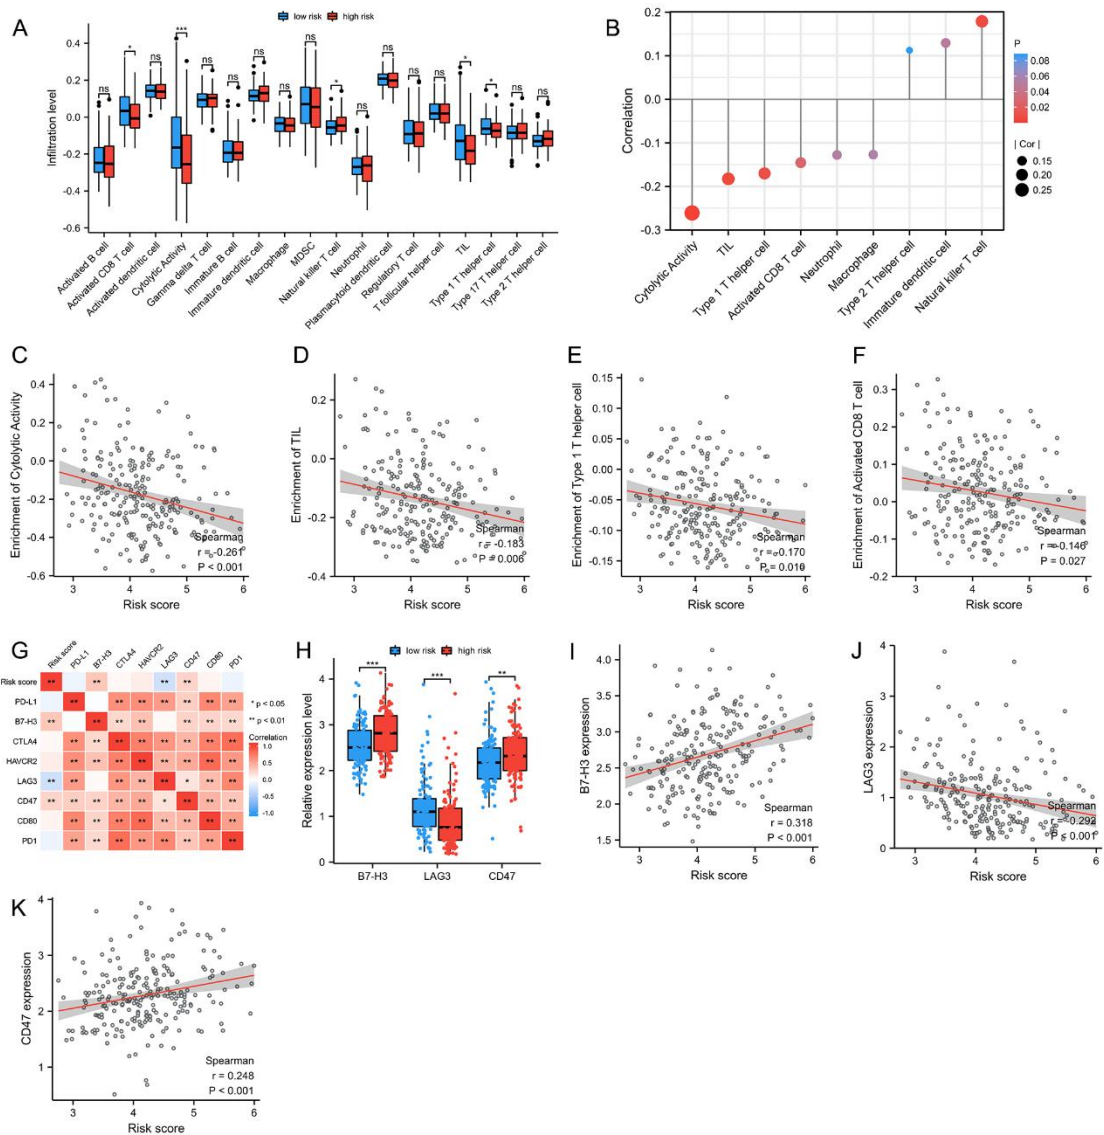

**Figure S7 The difference of immune cell infiltration and ICIs related-genes in different risk groups of ICGC cohort. (A)** The landscape of 18 immune cell infiltration proportions for ICGC cohort. **(B)** Correlation between immune cell infiltration level and risk score. Risk score was significantly negatively correlated with cytolytic activity **(C)**, TIL **(D)**, Th1 cell **(E)**, and activated CD8 T cell **(F)**. **(G-K)** Risk score was positively associated with B7-H3 and CD47 and negatively associated with LAG3. *p*-values were showed as follows: \* *p* < 0.05, \*\* *p* < 0.01, \*\*\* *p* < 0.001.

**Figure S8**

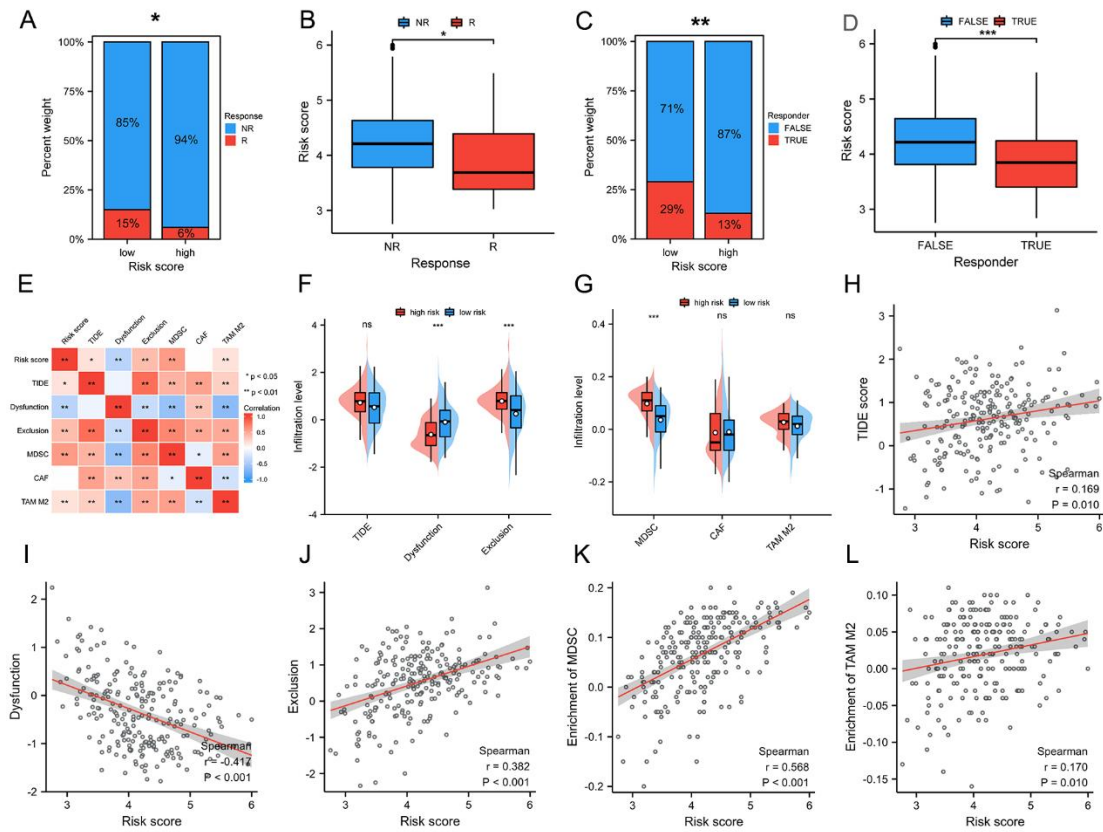

**Figure S8 Signature predicts immunotherapy response.** Therapeutic response to ICB therapy from ImmuneCellAI (A-B) and TIDE score (C-D). (E-L) Risk scores were positively correlated with TIDE score, T cell exclusion, MDSC and TAM M2 but negatively correlated with T cell dysfunction.  $p$ -values were showed as follows: \*  $p < 0.05$ , \*\*  $p < 0.01$ , \*\*\*  $p < 0.001$ .

**Supplementary tables**

**Table S1:** Univariate Cox regression analysis result of OS-genes

| Genesymbol | Coefficient | HR    | CI          | P-value |
|------------|-------------|-------|-------------|---------|
| SLC2A1     | 0.618       | 1.854 | 1.483-2.318 | <0.001  |
| CDO1       | -0.188      | 0.829 | 0.731-0.939 | 0.003   |
| ABCC1      | 0.458       | 1.581 | 1.234-2.026 | <0.001  |
| SRXN1      | 0.766       | 2.150 | 1.537-3.009 | <0.001  |
| CARS1      | 0.755       | 2.127 | 1.371-3.299 | 0.001   |
| LONP1      | 0.655       | 1.926 | 1.182-3.137 | 0.008   |



|           |        |       |              |        |
|-----------|--------|-------|--------------|--------|
| OTUB1     | 0.793  | 2.210 | 1.346-3.630  | 0.002  |
| CISD2     | 0.562  | 1.754 | 1.044-2.947  | 0.034  |
| FLT3      | -2.415 | 0.089 | 0.014-0.587  | 0.012  |
| PEBP1     | -0.300 | 0.741 | 0.551-0.996  | 0.047  |
| HRAS      | 0.447  | 1.564 | 1.169-2.091  | 0.003  |
| NOX1      | 0.539  | 1.714 | 1.072-2.742  | 0.025  |
| VEGFA     | 0.453  | 1.573 | 1.149-2.153  | 0.005  |
| DNAJB6    | 0.955  | 2.600 | 1.405-4.812  | 0.002  |
| GPT2      | -0.215 | 0.807 | 0.679-0.959  | 0.015  |
| ATG16L1   | 0.932  | 2.541 | 1.302-4.956  | 0.006  |
| FTL       | 0.261  | 1.298 | 1.039-1.623  | 0.022  |
| UBC       | 0.532  | 1.703 | 1.009-2.873  | 0.046  |
| MT3       | 0.512  | 1.668 | 1.245-2.235  | 0.001  |
| OXSR1     | 0.653  | 1.920 | 1.164-3.167  | 0.011  |
| RRM2      | 0.497  | 1.644 | 1.304-2.073  | <0.001 |
| ATG7      | 1.537  | 4.653 | 2.102-10.297 | <0.001 |
| GABARAPL1 | -0.341 | 0.711 | 0.561-0.900  | 0.005  |
| SAT1      | -0.413 | 0.662 | 0.454-0.963  | 0.031  |
| HELLS     | 0.659  | 1.933 | 1.313-2.845  | 0.001  |
| CHMP5     | 0.506  | 1.659 | 1.029-2.674  | 0.038  |
| ASNS      | 0.386  | 1.471 | 1.167-1.853  | 0.001  |
| HILPDA    | 0.523  | 1.688 | 1.367-2.085  | <0.001 |
| AIFM2     | 0.468  | 1.596 | 1.116-2.282  | 0.010  |
| NRAS      | 0.843  | 2.323 | 1.580-3.416  | <0.001 |
| TRIB3     | 0.290  | 1.337 | 1.077-1.659  | 0.008  |
| PCK2      | -0.193 | 0.824 | 0.687-0.990  | 0.038  |
| SQSTM1    | 0.464  | 1.591 | 1.260-2.009  | <0.001 |
| MYB       | 1.626  | 5.083 | 1.987-13.002 | 0.001  |
| PRDX1     | 0.729  | 2.072 | 1.463-2.934  | <0.001 |
| STMN1     | 0.510  | 1.665 | 1.330-2.085  | <0.001 |
| SLC3A2    | 0.375  | 1.454 | 1.021-2.071  | 0.038  |
| RPL8      | 0.247  | 1.280 | 1.027-1.596  | 0.028  |
| SLC1A4    | 0.521  | 1.683 | 1.239-2.287  | 0.001  |
| AURKA     | 0.400  | 1.492 | 1.177-1.892  | 0.001  |
| EIF2S1    | 1.293  | 3.645 | 1.967-6.755  | <0.001 |
| FANCD2    | 0.790  | 2.203 | 1.469-3.303  | <0.001 |
| ALB       | -0.120 | 0.886 | 0.795-0.989  | 0.031  |
| RELA      | 0.805  | 2.236 | 1.156-4.326  | 0.017  |
| MAPK1     | 0.494  | 1.639 | 1.083-2.481  | 0.020  |
| PGD       | 0.587  | 1.799 | 1.376-2.353  | <0.001 |
| HSF1      | 0.456  | 1.578 | 1.130-2.204  | 0.007  |
| IL33      | -0.331 | 0.718 | 0.533-0.968  | 0.030  |
| ATF4      | 0.514  | 1.672 | 1.142-2.450  | 0.008  |
| KEAP1     | 0.653  | 1.921 | 1.095-3.371  | 0.023  |

|         |        |       |              |        |
|---------|--------|-------|--------------|--------|
| SLC2A6  | 0.270  | 1.311 | 1.030-1.668  | 0.028  |
| ATG3    | 1.223  | 3.398 | 1.846-6.254  | <0.001 |
| G6PD    | 0.503  | 1.653 | 1.405-1.945  | <0.001 |
| TFRC    | 0.375  | 1.454 | 1.102-1.919  | 0.008  |
| TFR2    | -0.188 | 0.829 | 0.715-0.960  | 0.012  |
| PRKAA2  | 0.334  | 1.397 | 1.068-1.827  | 0.015  |
| MAFG    | 0.839  | 2.314 | 1.634-3.277  | <0.001 |
| FTH1    | 0.509  | 1.663 | 1.203-2.300  | 0.002  |
| SRC     | 0.320  | 1.378 | 1.088-1.744  | 0.008  |
| HMOX1   | 0.285  | 1.330 | 1.092-1.618  | 0.005  |
| ACSL3   | 0.569  | 1.766 | 1.245-2.504  | 0.001  |
| VDAC2   | 0.744  | 2.104 | 1.330-3.327  | 0.001  |
| NQO1    | 0.141  | 1.152 | 1.052-1.260  | 0.002  |
| TXNIP   | -0.204 | 0.815 | 0.676-0.982  | 0.032  |
| PRDX6   | 0.481  | 1.617 | 1.098-2.382  | 0.015  |
| MAPK3   | 0.647  | 1.910 | 1.259-2.898  | 0.002  |
| NCF2    | 0.395  | 1.485 | 1.190-1.852  | <0.001 |
| SLC38A1 | 0.412  | 1.509 | 1.236-1.843  | <0.001 |
| ATG5    | 0.865  | 2.375 | 1.324-4.259  | 0.004  |
| ZFP69B  | 2.042  | 7.703 | 3.776-15.716 | <0.001 |
| SLC7A11 | 0.556  | 1.744 | 1.358-2.241  | <0.001 |
| CDKN2A  | 0.312  | 1.366 | 1.106-1.688  | 0.004  |
| YY1AP1  | 0.718  | 2.051 | 1.309-3.211  | 0.002  |
| ATG13   | 1.040  | 2.830 | 1.510-5.304  | 0.001  |
| CAPG    | 0.273  | 1.313 | 1.107-1.558  | 0.002  |
| AKR1C3  | 0.356  | 1.427 | 1.118-1.821  | 0.004  |
| DDIT3   | 0.295  | 1.343 | 1.055-1.710  | 0.016  |
| CISD1   | 0.708  | 2.030 | 1.298-3.174  | 0.002  |
| SLC1A5  | 0.449  | 1.566 | 1.326-1.850  | <0.001 |
| TXNRD1  | 0.450  | 1.568 | 1.261-1.950  | <0.001 |
| NF2     | 0.493  | 1.638 | 1.008-2.661  | 0.046  |
| ELAVL1  | 0.809  | 2.245 | 1.223-4.119  | 0.009  |

**Table S2:** Clinicopathological features of the samples included in this study

| Clinical characteristics | TCGA cohort ( n = 364) |            | ICGC cohort (n = 230) |            |
|--------------------------|------------------------|------------|-----------------------|------------|
|                          | Total                  | Percentage | Total                 | Percentage |
| Age                      |                        |            |                       |            |
| < 60                     | 164                    | 45.05%     | 44                    | 19.13%     |
| ≥60                      | 200                    | 54.95%     | 186                   | 80.87%     |
| Gender                   |                        |            |                       |            |
| Female                   | 118                    | 32.42%     | 61                    | 26.52%     |
| Male                     | 246                    | 67.58%     | 169                   | 73.48%     |
| Race                     |                        |            |                       |            |
| White                    | 181                    | 49.73%     |                       |            |

|                           |     |        |     |        |
|---------------------------|-----|--------|-----|--------|
| Asian                     | 155 | 42.58% |     |        |
| Family History            |     |        |     |        |
| Negative                  | 204 | 56.04% |     |        |
| Positive                  | 111 | 30.49% |     |        |
| Serum AFP                 |     |        |     |        |
| < 20ng/ml                 | 147 | 40.38% |     |        |
| ≥ 20ng/ml                 | 128 | 35.16% |     |        |
| Total bilirubin           |     |        |     |        |
| < 1.0mg/dl                | 215 | 59.07% |     |        |
| ≥ 1.0mg/dl                | 84  | 23.08% |     |        |
| Albumin                   |     |        |     |        |
| < 3.5g/dl                 | 69  | 18.96% |     |        |
| ≥ 3.5g/dl                 | 226 | 62.09% |     |        |
| Adjacent hepatitis        |     |        |     |        |
| Negative                  | 117 | 32.14% |     |        |
| Positive                  | 114 | 31.32% |     |        |
| Fibrosis                  |     |        |     |        |
| Negative                  | 74  | 20.33% |     |        |
| Fibrosis                  | 57  | 15.66% |     |        |
| Cirrhosis                 | 77  | 21.15% |     |        |
| Vascular invasion         |     |        |     |        |
| Negative                  | 204 | 56.04% |     |        |
| Positive                  | 106 | 29.12% |     |        |
| T                         |     |        |     |        |
| T1+T2                     | 269 | 73.90% |     |        |
| T3+T4                     | 91  | 25.00% |     |        |
| TNM staging               |     |        |     |        |
| I–II                      | 253 | 69.51% | 140 | 60.87% |
| III–IV                    | 85  | 23.35% | 90  | 39.13% |
| Tumor grade               |     |        |     |        |
| I–II                      | 211 | 57.97% |     |        |
| III–IV                    | 130 | 35.71% |     |        |
| Child-Pugh classification |     |        |     |        |
| A                         | 216 | 59.34% |     |        |
| B+C                       | 22  | 6.04%  |     |        |

**Table S3:** Relationship between risk score and other clinicopathological features in TCGA cohort for OS.

| Clinicopathological variables | Training set (n = 228) |           |         | Validation set (n = 136) |           |         | Entire cohort (n = 364) |           |         |
|-------------------------------|------------------------|-----------|---------|--------------------------|-----------|---------|-------------------------|-----------|---------|
|                               | Low risk               | High risk | p value | Low risk                 | High risk | p value | Low risk                | High risk | p value |
| Age                           |                        |           |         |                          |           |         |                         |           |         |
| < 60                          | 52                     | 47        | 0.504   | 29                       | 36        | 0.229   | 81                      | 83        | 0.833   |
| ≥60                           | 62                     | 67        |         | 39                       | 32        |         | 101                     | 99        |         |

|                           |    |    |              |    |    |                  |     |     |              |  |
|---------------------------|----|----|--------------|----|----|------------------|-----|-----|--------------|--|
| Gender                    |    |    |              |    |    |                  |     |     |              |  |
| Female                    | 38 | 34 | 0.569        | 23 | 23 | 1.000            | 61  | 57  | 0.654        |  |
| Male                      | 76 | 80 |              | 45 | 45 |                  | 121 | 125 |              |  |
| Race                      |    |    |              |    |    |                  |     |     |              |  |
| White                     | 56 | 56 | 0.884        | 35 | 34 | 0.560            | 89  | 92  | 0.926        |  |
| Asian                     | 49 | 51 |              | 25 | 30 |                  | 77  | 78  |              |  |
| Family History            |    |    |              |    |    |                  |     |     |              |  |
| Negative                  | 65 | 59 | 0.244        | 35 | 45 | 0.242            | 102 | 102 | 0.593        |  |
| Positive                  | 32 | 41 |              | 21 | 17 |                  | 52  | 59  |              |  |
| Serum AFP                 |    |    |              |    |    |                  |     |     |              |  |
| < 20ng/ml                 | 49 | 41 | 0.620        | 35 | 22 | <b>0.011</b>     | 84  | 63  | 0.089        |  |
| ≥ 20ng/ml                 | 40 | 39 |              | 18 | 31 |                  | 60  | 68  |              |  |
| Total bilirubin           |    |    |              |    |    |                  |     |     |              |  |
| < 1.0mg/dl                | 67 | 60 | 0.535        | 46 | 42 | 0.981            | 113 | 102 | 0.454        |  |
| ≥ 1.0mg/dl                | 34 | 25 |              | 13 | 12 |                  | 48  | 36  |              |  |
| Albumin                   |    |    |              |    |    |                  |     |     |              |  |
| < 3.5g/dl                 | 22 | 23 | 0.419        | 13 | 11 | 0.645            | 34  | 35  | 0.493        |  |
| ≥ 3.5g/dl                 | 77 | 61 |              | 43 | 45 |                  | 122 | 104 |              |  |
| Adjacent hepatitis        |    |    |              |    |    |                  |     |     |              |  |
| Negative                  | 45 | 27 | 0.133        | 29 | 16 | 0.168            | 74  | 43  | 0.057        |  |
| Positive                  | 35 | 35 |              | 22 | 22 |                  | 58  | 56  |              |  |
| Fibrosis                  |    |    |              |    |    |                  |     |     |              |  |
| Negative                  | 28 | 18 | 0.665        | 16 | 12 | 0.997            | 45  | 29  | 0.727        |  |
| Fibrosis                  | 19 | 18 |              | 12 | 9  |                  | 31  | 26  |              |  |
| Cirrhosis                 | 25 | 21 |              | 18 | 13 |                  | 43  | 34  |              |  |
| Vascular invasion         |    |    |              |    |    |                  |     |     |              |  |
| Negative                  | 69 | 63 | 0.689        | 42 | 30 | 0.051            | 111 | 93  | 0.127        |  |
| Positive                  | 31 | 32 |              | 17 | 26 |                  | 48  | 58  |              |  |
| T                         |    |    |              |    |    |                  |     |     |              |  |
| T1+T2                     | 93 | 79 | <b>0.015</b> | 52 | 46 | 0.194            | 146 | 123 | <b>0.003</b> |  |
| T3+T4                     | 19 | 35 |              | 15 | 22 |                  | 33  | 58  |              |  |
| TNM staging               |    |    |              |    |    |                  |     |     |              |  |
| I-II                      | 89 | 72 | <b>0.014</b> | 50 | 42 | 0.189            | 140 | 113 | <b>0.001</b> |  |
| III-IV                    | 19 | 34 |              | 14 | 20 |                  | 30  | 55  |              |  |
| Tumor grade               |    |    |              |    |    |                  |     |     |              |  |
| I-II                      | 83 | 68 | <b>0.034</b> | 50 | 28 | <b>&lt;0.001</b> | 113 | 98  | <b>0.003</b> |  |
| III-IV                    | 30 | 45 |              | 16 | 39 |                  | 48  | 82  |              |  |
| Child-Pugh classification |    |    |              |    |    |                  |     |     |              |  |
| A                         | 75 | 59 | 0.348        | 42 | 40 | 1.000            | 118 | 98  | 0.411        |  |
| B+C                       | 6  | 8  |              | 4  | 4  |                  | 10  | 12  |              |  |

Bold values indicate  $p < 0.05$ .

**Table S4:** Relationship between risk score and other clinicopathological features in ICGC cohort for OS.

| Clinicopathological variables | ICGC cohort (n = 230) |           |                  |
|-------------------------------|-----------------------|-----------|------------------|
|                               | Low risk              | High risk | <i>p</i> value   |
| Age                           |                       |           |                  |
| < 60                          | 87                    | 16        | <b>&lt;0.001</b> |
| ≥60                           | 28                    | 99        |                  |
| Gender                        |                       |           |                  |
| Female                        | 31                    | 30        | 0.881            |
| Male                          | 84                    | 85        |                  |
| TNM staging                   |                       |           |                  |
| I–II                          | 85                    | 55        | <b>&lt;0.001</b> |
| III–IV                        | 30                    | 60        |                  |

Bold values indicate  $p < 0.05$ .
